# Supplementary material
Source: Springer Nature journal article supplement (https://www.springermedizin.de/resource/supplementary/12961_2008_73_MOESM2_ESM.pdf/9571356)
Supplement: MOESM2 [file 9571356]

Barriers

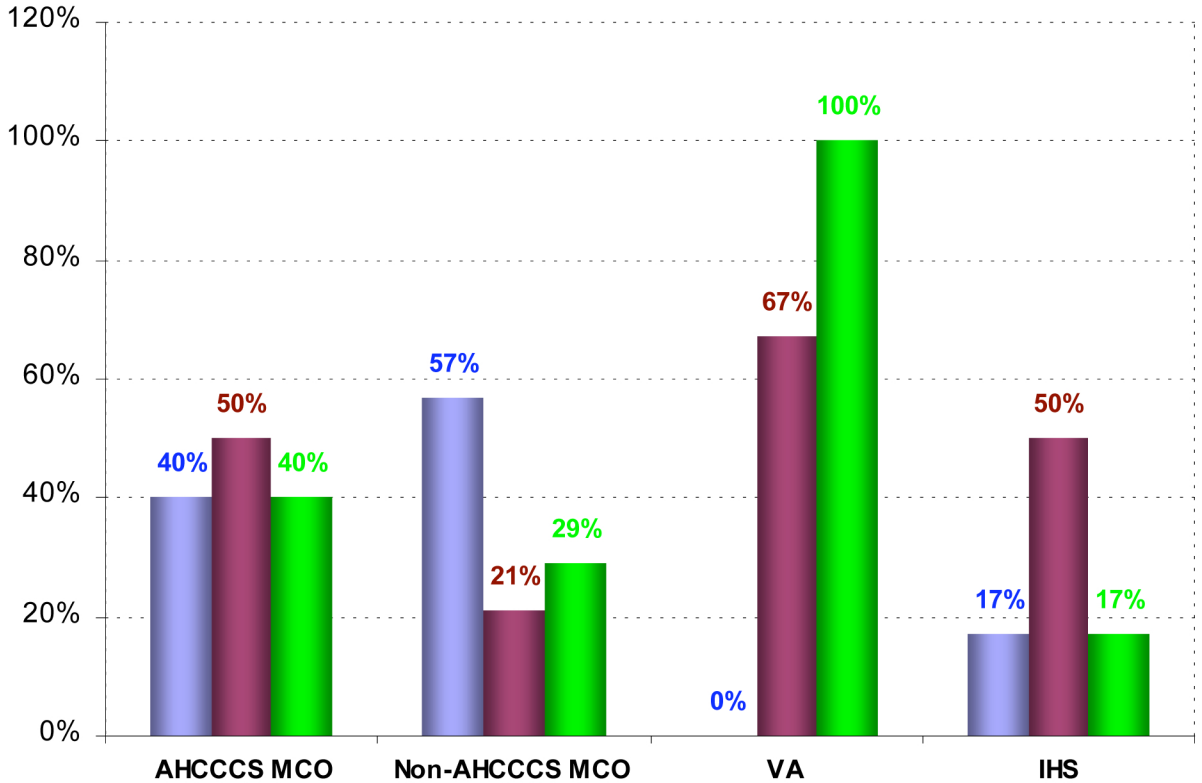

■ Lack of Requests from Plan Purchasers ■ Insufficient Staff ■ Cost of Implementing Guidelines
